# Supplementary material for: Crop salinization by intense pumping in regional discharge areas of an inland aquifer system (Cenozoic Duero basin aquifer, Spain)
Source: Copernicus journal article supplement (doi:10.5194/egusphere-2025-2395), 2025-06-30
Supplement: Supplementary file 1 [file Supplement 1.xlsx]

## Sheet: Groundwater table data
X	Y	Z	STATION NAME	TYPE
334851	4593279	670.5	P-01	Dug well (Quaternary aquifer)
334525	4593227	670.2	P-02	Dug well (Quaternary aquifer)
332885	4590193	656.8	P-04	Borehole (Cenozoic aquifer)
333769	4593462	669.9	P-06	Dug well (Quaternary aquifer)
333601	4593547	670.9	P-07	Dug well (Quaternary aquifer)
332844	4593763	668.6	P-10	Dug well (Quaternary aquifer)
333266	4593586	670.4	P-11	Dug well (Quaternary aquifer)
334294	4593862	670.2	P-14	Dug well (Quaternary aquifer)
334548	4594509	669.6	P-15	Dug well (Quaternary aquifer)
334579	4594355	669.6	P-17	Dug well (Quaternary aquifer)
334143	4594109	670.4	P-18	Dug well (Quaternary aquifer)
333974	4593954	670.1	P-19	Dug well (Quaternary aquifer)
333814	4593722	670.2	P-20	Dug well (Quaternary aquifer)
333960	4593591	670.2	p-28	Dug well (Quaternary aquifer)
334077	4593716	670.4	P-29	Dug well (Quaternary aquifer)
334105	4593357	670.6	P-30	Dug well (Quaternary aquifer)
333910	4594101	670.2	P-32	Dug well (Quaternary aquifer)
334581	4593511	670.3	P-34	Dug well (Quaternary aquifer)
333873	4594691	669.7	P-35	Dug well (Quaternary aquifer)
334041	4594761	669.4	P-36	Dug well (Quaternary aquifer)
333867	4594843	668.3	P-37	Dug well (Quaternary aquifer)
333722	4594529	669.6	P-38	Dug well (Quaternary aquifer)
333659	4594493	669.7	P-39	Dug well (Quaternary aquifer)
333554	4594777	669.5	P-40	Dug well (Quaternary aquifer)
331240	4594700	660.8	P-42	Borehole (Cenozoic aquifer)
331236	4594702	656.6	P-43	Borehole (Cenozoic aquifer)
331226	4594705	650.7	P-44	Borehole (Cenozoic aquifer)
332898	4595670	666.9	P-47	Dug well (Quaternary aquifer)
333001	4595776	665	P-49	Dug well (Quaternary aquifer)
333454	4594973	669.1	P-50	Dug well (Quaternary aquifer)
333280	4595329	667.9	P-52	Dug well (Quaternary aquifer)
331421	4595503	662.6	P-55	Borehole (Cenozoic aquifer)
339863	4596001	671.5	P-59	Borehole (Cenozoic aquifer) flowing well
339953	4596260	670	P-60	Dug well (Quaternary aquifer)
341131	4595392	675.5	P-61	Dug well (Quaternary aquifer)
341040	4595640	674.3	P-63	Borehole (Cenozoic aquifer) flowing well
341440	4596251	675	P-65	Dug well (Quaternary aquifer)
328950	4593457	665.3	P-69	Dug well (Quaternary aquifer)
329825	4593251	667.1	P-70	Dug well (Quaternary aquifer)
327189	4592850	651.2	P-71	Borehole (Cenozoic aquifer)
332196	4585452	679.6	P-75	Borehole (Cenozoic aquifer)
331590	4583377	673.5	P-76	Borehole (Cenozoic aquifer)
340533	4588669	672.1	P-77	Borehole (Cenozoic aquifer)
328616	4595187	662.6	P-81	Dug well (Quaternary aquifer)
331766	4597216	687.5	P-82	Dug well (Quaternary aquifer)
336010	4596932	679.1	P-84	Dug well (Quaternary aquifer)
336759	4596877	676.5	P-85	Dug well (Quaternary aquifer)
335178	4595713	668.5	P-86	Dug well (Quaternary aquifer)
333920	4596343	675.1	P-87	Borehole (Cenozoic aquifer)
333216	4596211	678.8	P-88	Dug well (Quaternary aquifer)
336279	4595351	671.1	P-89	Dug well (Quaternary aquifer)
