# Supplementary material for: Crop salinization by intense pumping in regional discharge areas of an inland aquifer system (Cenozoic Duero basin aquifer, Spain)
Source: Copernicus journal article supplement (doi:10.5194/egusphere-2025-2395), 2025-06-30
Supplement: Supplementary file 3 [file Supplement 2.xlsx]

## Sheet: 2021-2022
P-43 (PC0247009)			P-42 (PZ0247010)			P-44 (PZ0247008)
DATE	DEPTH (m)	M.A.S.L. (m)	DATE	DEPTH (m)	M.A.S.L. (m)	DATE	DEPTH (m)	M.A.S.L. (m)					P-42	302 m
2021-02-12	5.67	664.13	2021-02-12	8.32	661.53	2021-02-12	6.27	663.427					P-43	70 m
2021-03-01	5.38	664.323	2021-03-01	7.95	661.745	2021-03-01	5.9	663.647					P-44	190 m
2021-05-06	7.99	661.81	2021-05-06	6.98	662.87	2021-05-06	9.28	660.417
2021-06-18	10.16	659.64	2021-06-18	6.26	663.59	2021-06-18	14.82	654.877
2021-07-28	12.65	657.15	2021-07-28	7.6	662.248	2021-07-02	15.9	653.647
2021-08-05	12.99	656.81	2021-08-05	7.58	662.268	2021-07-28	17.84	651.857
2021-09-03	13.53	656.173	2021-09-03	9.76	659.935	2021-08-05	17.24	652.457
2021-10-19	10.89	658.91	2021-10-19	10.98	658.868	2021-09-03	19.8	649.747
2021-11-02	9.88	659.823	2021-11-02	10.91	658.785	2021-10-19	15.05	654.647
2022-01-21	6.8	662.903	2022-01-21	9.68	660.015	2021-11-02	13.17	656.377
2022-03-23	6.42	663.38	2022-03-23	8.12	661.728	2022-01-21	7.77	661.777
2022-04-06	6.06	663.739	2022-04-06	8	661.848	2022-03-23	6.66	663.037
2022-05-31 04:00:00	9.35	660.44	2022-05-31	7.2	662.648	2022-04-06	6.37	663.327
2022-06-10	10.85	658.945	2022-06-27	7.6	662.248	2022-05-31	12.26	657.437
2022-06-27	12.01	657.79	2022-07-12	8.27	661.578	2022-06-10	14.83	654.867
2022-07-12	12.64	657.16	2022-07-19	8.365	661.483	2022-06-27	17.86	651.837
2022-07-19	12.76	657.04	2022-08-03	9.06	660.788	2022-07-12	18.26	651.437
2022-08-03	13.225	656.575	2022-09-01	9.99	659.858	2022-07-19	18.38	651.317
2022-09-01	11.94	657.86	2022-09-20	10.45	659.398	2022-08-03	18.96	650.737
2022-09-20	11.94	657.86	2022-10-27	11	658.85	2022-09-01	18.71	650.987
2022-10-27	10.62	659.18				2022-09-20	17.18	652.517
						2022-10-27	14.18	655.52
																nota:	el p-43 hay un problema en el level hay que sumarle 2 metros desde mayo.
			medido por mi. Hay un desfase de 2 metros

## Sheet: Historic heads
P-43 (34-70 m)			P-42 (300 m)			P-44 (98-190 m)
DATE	DEPTH (m)	M.A.S.L. (m)	DATE	DEPTH (m)	M.A.S.L. (m)	DATE	DEPTH (m)	M.A.S.L. (m)
1996-04-23	4.06	665.643	1996-04-23	1.29	668.405
1996-05-22	4.19	665.513	1996-05-22	0.74	668.955
1996-06-19	9.06	660.643	1996-06-19	0.35	669.345
1996-07-23	13.24	656.463	1996-07-23	0.65	669.045
1996-09-10	14.04	655.663	1996-09-10	2.46	667.235
1996-10-09	11.32	658.383	1996-10-09	3.52	666.175
1996-12-02	6.56	663.143	1996-12-02	3.77	665.925
1997-02-24	3.52	666.183	1997-02-24	1.98	667.715
1997-04-22	8.73	660.973	1997-04-22	0.87	668.825
1997-05-20	9.34	660.363	1997-05-20	0.88	668.815
1997-06-18	6.79	662.913	1997-06-18	1.05	668.645
1997-07-22	10.84	658.863	1997-07-22	1.13	668.565
1997-09-24	12.37	657.333	1997-09-24	2.57	667.125
1997-10-27	8.59	661.113	1997-10-27	3.25	666.445
1997-11-24	6.08	663.623	1997-11-24	3.06	666.635
1997-12-16	4.9	664.803	1997-12-16	2.68	667.015
1998-01-26	3.38	666.323	1998-01-26	2.02	667.675
1998-02-23	2.63	667.073	1998-02-23	1.5	668.195
1998-05-26	7.08	662.623	1998-05-26	0	669.695
1998-06-24	9.46	660.243	1998-06-24	0	669.695
1998-07-28	13.82	655.883	1998-07-28	0.6	669.095
1998-09-15	14.36	655.343	1998-09-15	2.68	667.015
1998-10-27	9.34	660.363	1998-10-27	4.16	665.535
1998-11-24	7.51	662.193	1998-11-24	4.31	665.385
1998-12-16	6.16	663.543	1998-12-16	4.07	665.625
1999-01-26	4.61	665.093	1999-01-26	3.07	666.625
1999-03-24	5.23	664.473	1999-03-24	0.69	669.005
1999-04-27	7.49	662.213	1999-04-27	1.1	668.595
1999-05-25	7.7	662.003	1999-05-25	0.92	668.775
1999-06-23	13.48	656.223	1999-06-23	1.1	668.595
1999-07-27	15.96	653.743	1999-07-27	2.2	667.495
1999-09-27	11.91	657.793	1999-09-27	5.05	664.645
1999-10-27	9.19	660.513	1999-10-27	5.49	664.205
1999-11-23	7.19	662.513	1999-11-23	5.41	664.285
1999-12-27	5.72	663.983	1999-12-27	4.68	665.015
2000-01-25	5.13	664.573	2000-01-25	4.02	665.675
2000-02-23	4.47	665.233	2000-02-23	3.22	666.475
2000-03-28	6.29	663.413	2000-03-28	2.42	667.275
2000-04-26	4.48	665.223	2000-04-26	1.82	667.875
2000-05-24	3.91	665.793	2000-05-24	1.4	668.295
2000-06-19	8.62	661.083	2000-06-19	1.05	668.645
2000-07-15	11.16	658.543	2000-07-15	1.25	668.445
2000-08-15	13.52	656.183	2000-08-15	2.35	667.345
2000-09-15	14.31	655.393	2000-09-15	3.35	666.345
2000-10-15	10.2	659.503	2000-10-15	4.03	665.665
2000-11-15	7.83	661.873	2000-11-15	4.85	664.845
2000-12-04	7.01	662.693	2000-12-04	5	664.695
2001-01-24	5.05	664.653	2001-01-15	3.81	665.885
2001-02-21	4.32	665.383	2001-02-21	3.21	666.485
2001-03-27	3.31	666.393	2001-03-27	2.19	667.505
2001-04-25	5.95	663.753	2001-04-25	1.73	667.965
2001-05-25	6.72	662.983	2001-05-25	1.4	668.295
2001-06-26	12.75	656.953	2001-06-26	1.49	668.205
2001-07-25	14.83	654.873	2001-07-25	2.18	667.515
2001-08-15	15.5	654.203	2001-08-15	3.33	666.365
2001-09-04	16.16	653.543	2001-09-04	4.48	665.215
2001-10-24	11.28	658.423	2001-10-24	6.45	663.245
2001-11-26	8.25	661.453	2001-11-26	6.47	663.225
2001-12-18	7.22	662.483	2001-12-18	6.14	663.555
2002-01-28	5.6	664.103	2002-01-28	5.12	664.575
2002-02-13	5.46	664.243	2002-02-13	4.58	665.115
2002-02-25	5.47	664.233	2002-02-25	4.23	665.465
2002-03-20	4.07	665.633	2002-03-20	3.65	666.045
2002-04-23	6.29	663.413	2002-04-23	2.88	666.815
2002-05-27	10.3	659.403	2002-05-27	2.46	667.235
2002-06-24	14.3	655.403	2002-06-24	2.66	667.035
2002-07-23	16.37	653.333	2002-07-23	3.71	665.985
2002-08-26	17.15	652.553	2002-08-26	5.71	663.985
2002-09-24	15.09	654.613	2002-09-24	7.39	662.305
2002-10-28	11.82	657.883	2002-10-28	8.31	661.385
2002-11-15	9.77	659.933	2002-11-15	8.15	661.545
2002-12-15	8.17	661.533	2002-12-15	7.7	661.995
2003-01-15	6.15	663.553	2003-01-15	6.57	663.125
2003-02-15	5.49	664.213	2003-02-15	5.58	664.115
2003-03-15	5.14	664.563	2003-03-15	4.8	664.895
2003-04-15	4.81	664.893	2003-04-15	3.9	665.795
2003-05-15	6.78	662.923	2003-05-15	3.15	666.545
2003-06-15	12.36	657.343	2003-06-15	2.96	666.735
2003-07-15	14.57	655.133	2003-07-15	3.24	666.455
2003-08-15	16.58	653.123	2003-08-15	4.42	665.275
2003-09-15	16.07	653.633	2003-09-15	6.73	662.965
2003-10-15	12.52	657.183	2003-10-15	7.89	661.805
2003-11-15	10.02	659.683	2003-11-15	7.99	661.705
2003-12-15	8.5	661.203	2003-12-15	7.65	662.045
2004-01-15	6.71	662.993	2004-01-15	6.55	663.145
2004-02-15	5.92	663.783	2004-02-15	5.7	663.995
2004-03-15	5.73	663.973	2004-03-15	4.84	664.855
2004-04-15	6.47	663.233	2004-04-15	3.97	665.725
2004-05-15	8.17	661.533	2004-05-15	3.55	666.145
2004-06-15	11.86	657.843	2004-06-15	3.45	666.245
2004-07-15	14.76	654.943	2004-07-15	3.73	665.965
2004-08-15	17.38	652.323
2004-09-15	16.5	653.203	2004-09-15	7.69	662.005
2004-10-15	13.64	656.063	2004-10-15	8.57	661.125
2004-11-15	11.25	658.453	2004-11-15	8.87	660.825
2004-12-15	9.52	660.183	2004-12-15	8.41	661.285
2005-01-27	7.41	662.293	2005-01-27	7.18	662.515
2005-02-23	6.83	662.873	2005-02-23	6.57	663.125
2005-03-26	7.38	662.323	2005-03-26	5.8	663.895
2005-04-26	7.61	662.093	2005-04-26	4.97	664.725
2005-05-25	10.96	658.743	2005-05-25	4.75	664.945
2005-06-25	15.21	654.493	2005-06-25	4.93	664.765
2005-07-25	17.52	652.183	2005-07-25	6.53	663.165
2005-08-24	18.07	651.633	2005-08-24	8.39	661.305
2005-09-23	17.41	652.293	2005-09-23	10.28	659.415
2005-10-24	15.04	654.663	2005-10-24	11.46	658.235
2005-11-26	12.59	657.113	2005-11-26	11.58	658.115
2005-12-27	10.73	658.973	2005-12-27	10.94	658.755
2006-01-27	9.28	660.423	2006-01-27	10.17	659.525
2006-02-22	8.15	661.553	2006-02-22	9.07	660.625
2006-03-25	7.4	662.303	2006-03-25	8.06	661.635
2006-04-29	7.34	662.363	2006-04-29	6.99	662.705
2006-05-23	6.4	663.303	2006-05-23	11.05	658.645
2006-06-24	13.96	655.743	2006-06-24	6.44	663.255
2006-07-29	15.67	654.033	2006-07-29	7.01	662.685
2006-08-26	16.33	653.373	2006-08-26	8.5	661.195
2006-10-24	12.73	656.973	2006-10-24	10.55	659.145
2006-11-23	10.12	659.583	2006-11-23	10.28	659.415
2006-12-23	9.45	660.253	2006-12-23	9.79	659.905
2007-01-20	8.53	661.173	2007-01-20	9.03	660.665
2007-02-28	7.69	662.013	2007-02-28	8.14	661.555
2007-03-21	7.59	662.113	2007-03-21	7.33	662.365
2007-04-21	7.59	662.113	2007-04-21	6.6	663.095
2007-05-21	9.2	660.503	2007-05-21	5.89	663.805
2007-06-22	9.19	660.513	2007-06-22	5.7	663.995
2007-07-19	14.2	655.503	2007-07-19	5.86	663.835
2007-08-23	16.14	653.563	2007-08-23	6.57	663.125
2007-09-18	15.55	654.153	2007-09-18	7.63	662.065
2007-10-22	13.32	656.383	2007-10-22	8.48	661.215
2007-11-22	10.84	658.863	2007-11-22	8.68	661.015
2007-12-21	9.19	660.513	2007-12-21	8.37	661.325
2008-01-17	7.79	661.913	2008-01-17	7.96	661.735
2008-02-22	7.24	662.463	2008-02-22	6.88	662.815
2008-03-16	7.07	662.633	2008-03-16	6.19	663.505
2008-04-23	7.13	662.573	2008-04-23	5.54	664.155
2008-05-16	7.87	661.833	2008-05-16	5.12	664.575
2008-06-21	7.68	662.023	2008-06-21	4.76	664.935
2008-07-18	10.96	658.743	2008-07-19	4.76	664.935
2008-08-23	14.4	655.303	2008-08-23	5.51	664.185
2008-09-18	14.67	655.033	2008-09-18	6.82	662.875
2008-10-24	12.53	657.173	2008-10-24	7.97	661.725
2008-11-18	10.75	658.953	2008-11-18	8.24	661.455
2008-12-20	8.95	660.753	2008-12-20	7.98	661.715
2009-01-19	7.75	661.953	2009-01-19	7.26	662.435
2009-02-21	6.99	662.713	2009-02-21	6.99	662.705
2009-03-19	7.33	662.373	2009-03-19	6.05	663.645
2009-04-23	8.61	661.093	2009-04-23	5.41	664.285
2009-05-19	11.12	658.583	2009-05-19	5.29	664.405
2009-06-23	13.81	655.893	2009-06-23	5.57	664.125
2009-07-20	15.77	653.933	2009-07-20	6.1	663.595
2009-08-24	16.92	652.783	2009-08-24	7.91	661.785
2009-09-21	16.41	653.293	2009-09-21	9.22	660.475
2009-10-21	14.86	654.843	2009-10-21	10.21	659.485	2009-10-21	19.83	649.717
2009-11-21	12.85	656.853	2009-11-21	10.48	659.215	2009-11-21	16.18	653.367
2009-12-19	11.22	658.483	2009-12-19	10.05	659.645	2009-12-19	13.29	656.257
2010-01-23	9.32	660.383	2010-01-23	9.21	660.485	2010-01-23	10.49	659.057
2010-02-28	8.18	661.523	2010-02-28	8.16	661.535	2010-02-28	8.69	660.857
2010-03-25	7.69	662.013	2010-03-25	7.46	662.235	2010-03-25	7.77	661.777
2010-04-28	7.39	662.313	2010-04-28	6.73	662.965	2010-04-28	7	662.547
2010-05-25	8.38	661.323	2010-05-25	6.12	663.575
2010-06-25	10.24	659.463	2010-06-25	5.84	663.855	2010-06-25	11.41	658.137
2010-07-27	12.73	656.973	2010-07-27	6.12	663.575	2010-07-27	15.34	654.207
2010-08-27	14.77	654.933	2010-08-27	6.96	662.735	2010-08-27	19.22	650.327
2010-09-27	13.81	655.893	2010-09-27	7.72	661.975	2010-09-27	18.08	651.467
2010-10-26	12.35	657.353	2010-10-26	8.4	661.295
2010-11-26	10.23	659.473	2010-11-26	7.87	661.825	2010-11-26	12.22	657.327
2010-12-23	8.94	660.763	2010-12-23	7.98	661.715
2011-01-26	7.97	661.733	2011-01-26	7.61	662.085	2011-01-26	8.27	661.277
2011-02-23	7.26	662.443	2011-02-23	6.87	662.825
2011-03-25	6.92	662.783	2011-03-25	6.21	663.485	2011-03-25	6.46	663.087
2011-06-24	11.14	658.563	2011-06-24	5.25	664.445	2011-06-24	12.31	657.237
2012-08-14	13.36	656.343	2012-08-14	6.96	662.735	2012-08-14	19.21	650.337
2012-09-18	13.7	656.003	2012-09-18	8.46	661.235	2012-09-18	20	649.547
2012-10-18			2012-10-18			2012-10-18	16.74	652.807
2012-12-18	7.99	661.713	2012-12-18	9.55	660.145	2012-12-18	10.23	659.317
2013-02-17	6.02	663.683	2013-02-17	8.16	661.535	2013-02-17	6.62	662.927
2013-05-25	5.31	664.393	2013-05-25	5.84	663.855	2013-05-25	5.55	663.997
2013-12-09	7.07	662.633	2013-12-09	8.35	661.345	2013-12-09	8.99	660.557
2014-01-11	5.66	664.043	2014-01-11	7.72	661.975	2014-01-11	6.78	662.767
2014-03-13	4.19	665.513	2014-03-13	5.99	663.705	2014-03-13	4.22	665.327
2014-05-06	7.09	662.613	2014-05-06	5.17	664.525	2014-05-06	8.26	661.287
2014-07-03	11.01	658.693	2014-07-03	5.83	663.865	2014-07-03	16.05	653.497
2014-09-01	12.33	657.373	2014-09-01	7.84	661.855	2014-09-01	18.03	651.517
2014-11-04	9.51	660.193	2014-11-04	9.18	660.515	2014-11-04	12.76	656.787
2015-01-08	5.96	663.743	2015-01-08	8.49	661.205	2015-01-08	7.29	662.257
2015-03-03	7.01	662.693	2015-03-02	4.79	664.905	2015-03-02	5.13	664.417
2015-05-04	7.11	662.593	2015-05-04	6.04	663.655	2015-05-04	8.52	661.027
2015-07-01	11.09	658.613	2015-07-01	6.64	663.055	2015-07-01	15.56	653.987
2015-09-02	13.06	656.643	2015-09-02	8.79	660.905	2015-09-02	19.88	649.667
2015-11-05	9.86	659.843	2015-11-05	10.19	659.505	2015-11-05	13.48	656.067
2016-01-11	6.36	663.343	2016-01-11	9.07	660.625	2016-01-11	7.83	661.717
2016-03-02	5.01	664.693	2016-03-02	7.71	661.985	2016-03-02	5.63	663.917
2016-05-05	4.84	664.863	2016-05-05	6.12	663.575	2016-05-05	4.73	664.817
2016-07-05	9.94	659.763	2016-07-05	5.64	664.055	2016-07-05	13.4	656.147
2016-09-15	12.41	657.293	2016-09-15	7.95	661.745	2016-09-15	18.6	650.947
2016-11-03	9.84	659.863	2016-11-03	9.27	660.425	2016-11-03	13.58	655.967
2017-01-04	6.7	663.003	2017-01-04	8.89	660.805	2017-01-04	8.18	661.367
2017-03-01	5.42	664.283	2017-03-01	7.51	662.185	2017-03-01	5.73	663.817
2017-05-02	9.29	660.413	2017-05-02	6.64	663.055	2017-05-02	12.03	657.517
2017-07-05	13.22	656.483	2017-07-05	7.88	661.815	2017-07-05	19.7	649.847
2017-09-05	13.66	656.043	2017-09-05	10.24	659.455	2017-09-05	20.03	649.517
2017-11-02	11.59	658.113	2017-11-02	10.99	658.705	2017-11-02	15.95	653.597
2018-01-04	8.19	661.513	2018-01-04	9.74	659.955	2018-01-04	10.13	659.417
2018-03-02	6.35	663.353	2018-03-02	8.99	660.705	2018-03-02	7.01	662.537
2018-05-08	5.55	664.153	2018-05-08	7.39	662.305	2018-05-08	5.73	663.817
2018-07-02	7.71	661.993	2018-07-02	6.77	662.925	2018-07-02	9.43	660.117
2018-09-05	11.27	658.433	2018-09-05	7.77	661.925	2018-09-05	15.81	653.737
2018-11-05	10.51	659.193	2018-11-05	9.15	660.545	2018-11-05	13.33	656.217
2019-01-09	6.77	662.933	2019-01-09	8.93	660.765	2019-01-09	7.99	661.557
2019-03-12	5.94	663.763	2019-03-12	3.98	665.715	2019-03-12	7.13	662.417
2019-05-02	7.04	662.663	2019-05-02	6.94	662.755	2019-05-02	8.58	660.967
2019-07-01	12.79	656.913	2019-07-01	7.87	661.825	2019-07-01	19.45	650.097
2019-09-03	14.23	655.473	2019-09-03	10.69	659.005	2019-09-03	20.94	648.607
2019-11-05	10.56	659.143	2019-11-05	11.71	657.985	2019-11-05	14.46	655.087
2020-01-09	7.21	662.493	2020-01-09	10.6	659.095	2020-01-09	9.23	660.317
2020-03-04	6.13	663.573	2020-03-04	9.09	660.605	2020-03-04	6.92	662.627
2020-05-11	5.78	663.923	2020-05-11	7.53	662.165	2020-05-11	6.64	662.907
2020-07-01	9.1	660.603	2020-07-01	7.38	662.315	2020-07-01	12.21	657.337
2020-09-18	10.95	658.753	2020-09-18	9.05	660.645	2020-09-18	15.9	653.647
2020-11-10	8.44	661.263	2020-11-10	2.15	667.545	2020-11-10	11.36	658.187
2021-01-12	6.25	663.453	2021-01-12	1.95	667.745	2021-01-12	7.43	662.117
2021-03-01	5.38	664.323	2021-03-01	7.95	661.745	2021-03-01	5.9	663.647
2021-05-11	7.82	661.883	2021-05-11	6.77	662.925	2021-05-11	9.61	659.937
2021-07-02	11.5	658.203	2021-07-02	7.54	662.155	2021-07-02	15.9	653.647
2021-09-03	13.53	656.173	2021-09-03	9.76	659.935	2021-09-03	19.8	649.747
2021-11-02	9.88	659.823	2021-11-02	10.91	658.785	2021-11-02	13.17	656.377
2022-01-21	6.8	662.903	2022-01-21	9.68	660.015	2022-01-21	7.77	661.777
2022-03-18	6.28	663.423	2022-03-18	8.28	661.415	2022-03-18	6.72	662.827
2022-05-13	6.61	663.093	2022-05-13	7.33	662.365	2022-05-13	7.26	662.287
2022-07-19	12.75	656.953	2022-07-19	8.385	661.31	2022-07-19	18.39	651.157
