# Supplementary material for: Crop salinization by intense pumping in regional discharge areas of an inland aquifer system (Cenozoic Duero basin aquifer, Spain)
Source: Copernicus journal article supplement (doi:10.5194/egusphere-2025-2395), 2025-06-30
Supplement: Supplementary file 5 [file Supplement 3.xlsx]

## Sheet: P42 (302m)
2022-05-06		2022-05-31		2022-06-27		2022-07-12		2022-09-01
Altitude (m.a.s.l.)	EC (µS/cm)	Altitude (m.a.s.l.)	EC (µS/cm)	Altitude (m.a.s.l.)	EC (µS/cm)	Altitude (m.a.s.l.)	EC (µS/cm)	Altitude (m.a.s.l.)	EC (µS/cm)
662.87	3236	662.32	3133	660.198	230.6	659.428	2500	650.599	2852.9
661.87	3231	661.87	3139	659.786	2844.6	568.828	2800	649.475	2894.2
660.87	3251	660.87	3136	659.325	2896	551.828	4600	649.418	2897.5
655.87	3668	655.87	3140	659.293	2870.6	549.828	4900	646.503	2919.2
650.87	3240	650.87	3140	659.236	2899.8	547.828	5500	646.417	2924.7
640.87	3251	640.87	3138	657.193	2937	543.828	5900	643.815	2936.6
630.87	3261	630.87	3136	656.31	2938.2	541.828	6000	643.765	2936.3
620.87	3261	620.87	3144	652.799	2953.3	518.828	6000	640.486	2960.5
590.87	3307	590.87	3160	644.864	2960.7	502.828	6200	640.493	2959.8
580.87	3306	580.87	3239	644.65	2957.5	492.828	6200	639.952	2969.8
570.87	3303	570.87	3506	644.61	2962.6	467.828	6500	639.966	2971.5
				642.41	2966.2	458.828	6600	639.953	2974.2
				635.867	2969.2	449.828	6600	637.778	2983.5
				630.39	2970.4	437.828	6700	637.778	2980.1
				626.87	2972.8	408.828	6900	637.051	2984.8
				622.641	2972.9	373.828	7000	634.384	2990.5
				622.651	2972.8			634.377	2989.3
				622.651	2972.4			634.377	2989.1
				617.074	2975.6			634.37	2987.7
				615.725	2975.9			631.469	2995.5
				612.866	2976.2			630.827	2995.7
				606.295	2976.9			630.805	2994.8
				606.193	2976.8			630.784	2996.4
				600.009	2977.5			629.059	2998
				592.506	2978.2			627.825	2998.7
				592.405	2976.6			627.797	2998.5
				589.191	2975.6			627.269	2998.7
				585.846	2976.2			625.915	2999.9
				578.173	2977.1			625.836	2999.5
				577.271	2976.3			623.969	3001.6
				577.261	2976.9			622.485	3001.7
				575.983	2976.4			621.416	3002.4
				569.517	2976.9			620.005	3002
				563.112	2977.2			618.236	3003.6
				563.052	2977.2			615.784	3002.2
				561.947	2977.8			614.052	3004.5
				553.738	3041			613.41	3002.9
				553.718	3041			612.235	3004.2
				551.68	3040.6			609.846	3003.3
				544.73	3041.9			609.832	3003.3
				539.259	3040.1			607.067	3005.2
				539.239	3040.5			605.413	3003.8
				538.681	3040.1			605.399	3003.8
				530.333	3303			603.952	3005.1
				522.301	3427.6			601.914	3003.5
				522.211	3427.8			601.814	3003.9
				521.735	3487.2			598.187	3003.5
				513.157	4033			598.187	3003
				512.094	4107.7			595.928	3004.4
				507.731	4638.9			593.805	3004.3
				499.532	6473.4			593.726	3004.1
				495.019	6957.1			593.142	3004.6
				494.877	6957.5			590.291	3004.9
				494.867	6960.5			588.994	3003.9
				489.242	6974.3			588.987	3007.9
				484.478	6983			587.064	3008.8
				484.468	6979.1			583.964	3007.2
				479.977	6984.3			583.822	3007.3
				475.162	6989.5			581.243	3088.3
				475.142	6989.9			579.732	3087.3
				471.825	6989.5			579.725	3087.7
				464.912	6993.3			576.875	3135.9
				462.728	6993.8			576.868	3134.9
				454.051	6999			576.882	3127.7
				451.745	6999			576.861	3959.2
				446.474	7002.5			576.597	3790.9
				439.966	7027.8			574.994	3969.1
				439.511	7024.4			573.349	4591.5
				439.471	7024.9			572.501	4882.9
				431.279	7048.5			572.551	4888.5
				431.087	7046.9			572.529	4894.6
				431.077	7048.2			572.508	4897.2
				431.057	7046.9			572.494	4893.8
				428.093	7044.6			572.494	4895.5
				421.904	7044.2			572.473	4895.2
				421.6	7043.3			572.465	4890.5
				421.317	7044.2			572.23	4873.6
				413.841	7046.1			570.998	4816.6
				411.849	7043			569.239	5112.7
				411.617	7044.8			568.334	5124
				404.252	7045			568.32	5124.7
				400.396	7040.8			568.313	5125.3
				400.387	7043.1			568.313	5125.9
				400.357	7042.1			567.451	5122.8
				393.775	7050.8			565.621	5324.2
				391.969	7039.2			564.118	5367.4
				388.222	7043.5			564.011	5535.1
				383.057	7037.2			564.011	5546.7
				383.007	7038.2			564.011	5562.6
				383.027	7036.9			564.004	5573.9
				382.977	7036.5			564.004	5569.5
				377.248	8018.6			564.011	5563.3
				376.054	7929.5			564.004	5558.2
				376.084	8271.1			564.004	5560.4
				373.434	10376.3			563.94	5632.8
				373.403	9962.9			563.448	5675.7
				373.404	8823			562.552	5681.2
				370.541	8783.3			561.541	5695.1
				370.541	9840.5			561.533	5699.7
				370.531	10155.4			561.534	5698.1
				370.51	9015.8			561.534	5698.1
				370.54	9601.5			561.505	5693.5
				370.54	9819.9			561.006	5689.5
				366.96	11116.1			560.259	5697.2
				363.371	11844.9			559.718	5691.9
				363.351	13056.8			557.895	5822.2
								557.81	5865.1
								557.795	5875.2
								557.795	5867.9
								557.347	6077
								555.219	6672.1

## Sheet: P43 (70m)
2022-04-20		2022-05-31		2022-06-10		2022-08-03		2022-09-01
Altitude (m.a.s.l.)	EC (µS/cm)	Altitude (m.a.s.l.)	EC (µS/cm)	Altitude (m.a.s.l.)	EC (µS/cm)	Altitude (m.a.s.l.)	EC (µS/cm)	Altitude (m.a.s.l.)	EC (µS/cm)
663.44	443	660.31	443	658.95	263	656.58	355	655.81	330
660.81	444	650.81	1642	658.81	268	655.81	341	654.81	332
650.81	678	649.81	1667	657.81	430	654.81	331	650.81	346
649.81	1167	648.81	1672	656.81	431	650.81	350	640.81	572
648.81	1629	647.81	1673	655.81	431	640.81	737	639.81	583
647.81	1647	646.81	1673	654.81	431	639.81	892	638.81	602
646.81	1654	645.81	1674	653.81	447	638.81	1076	637.81	608
645.81	1655	644.81	1674	652.81	463	637.81	1286	636.81	708
644.81	1655	643.81	1674	651.81	512	636.81	1417	635.81	841
643.81	1655	642.81	1675	650.81	671	635.81	1500	634.81	1294
642.81	1656	641.81	1678	650.31	850	634.81	1629	633.81	1406
641.81	1657	640.81	1682	649.81	1010	633.81	1635	632.81	1458
640.81	1657	635.81	1692	649.31	1144	632.81	1630	631.81	1460
635.81	1671	630.81	1741	648.81	1322	631.81	1633	630.81	1461
630.81	1800	629.81	1741	648.31	1484	630.81	1634	625.81	1518
629.81	1800	625.81	1744	647.81	1550	629.81	1635	620.81	1786
625.81	1801	620.81	1808	646.81	1615	628.81	1637	615.81	1785
620.81	1864	615.81	1812	645.81	1636	627.81	1638	610.81	1790
615.81	1904	613.81	1814	644.81	1637	626.81	1639	605.81	1791
613.81	1904	610.81	1817	643.81	1637	625.81	1641	601.81	1790
610.81	1910	605.81	1818	642.81	1641	624.81	1654	600.81	1605
605.81	1914	604.81	1819	641.81	1646	623.81	1669
604.81	1916	603.81	1816	640.81	1657	622.81	1730
603.81	1912	602.81	1817	639.81	1659	621.81	1792
602.81	1913	601.81	1818	635.81	1682	620.81	1793
601.81	1914	600.81	1686	630.81	1705	619.81	1794
600.81	1802			625.81	1737	618.81	1796
599.81	1582			624.81	1739	617.81	1797
				620.81	1789	616.81	1798
				615.81	1793	615.81	1794
				610.81	1794	614.81	1795
				609.81	1791	613.81	1798
				608.81	1792	612.81	1796
				607.81	1793	611.81	1796
				606.81	1795	610.81	1798
				605.81	1796	609.81	1799
				604.81	1797	605.81	1802
				603.81	1799	601.81	1804
				602.81	1796	600.81	1626
				601.81	1797

## Sheet: P44 (190m)
2022-04-06		2022-05-06		2022-05-31		2022-06-10		2022-08-03		2022-09-01
Altitude (m.a.s.l.)	EC (µS/cm)	Altitude (m.a.s.l.)	EC (µS/cm)	Altitude (m.a.s.l.)	EC (µS/cm)	Altitude (m.a.s.l.)	EC (µS/cm)	Altitude (m.a.s.l.)	EC (µS/cm)	Altitude (m.a.s.l.)	EC (µS/cm)
663.28	931	660.42	922	656.58	887	646.339	868.2	648.811	912.9	648.781	881.7
650.58	927	659.58	900	650.58	887	639.577	900.5	648.785	967.4	648.852	885.2
630.58	977	658.58	914	630.58	936	632.004	914.8	648.777	955.1	648.876	889.5
610.58	986	655.58	920	610.58	943	628.289	916.6	648.784	923.3	646.787	895.7
590.58	992	650.58	923	590.58	948	626.287	919.9	647.838	937.2	646.467	896.5
580.58	1003	640.58	953	580.58	957	619.144	921.6	647.191	923.5	646.36	897.1
578.58	1005	630.58	959	578.58	958	617.24	921.6	647.184	920.4	644.805	898.6
575.58	1011	620.58	964	575.58	961	612.365	923.4	645.715	918.6	644.762	898.9
574.54	1012	610.58	967	574.58	962	607.319	924.2	645.651	919.9	643.299	914.2
573.58	1044	590.58	972	573.58	963	606.72	924.3	644.638	918.5	643.2	915.8
572.58	1189	580.58	979	572.58	961	600.114	925	644.146	918.1	641.566	934.3
571.58	2689	573.58	985	571.58	2737	599.109	924.6	644.117	916.5	641.452	934.7
570.58	2772	572.58	985	570.58	2750	593.694	925	642.006	956.7	639.84	943.5
		571.58	3259			590.801	925	641.985	955.1	639.79	943.5
		570.58	3430			590.658	924.9	639.346	966.5	638.227	946.3
						584.902	925.9	639.317	964.9	636.58	947.4
						579.578	927.6	637.006	964.3	636.458	947.5
						579.614	926.9	636.799	962.6	634.262	948.3
						578.566	926.9	635.616	961.6	634.183	948.3
						578.416	927	635.58	960.1	634.033	948.3
						577.875	926.9	635.016	958.7	632.215	948.6
						577.49	926.9	634.217	958.2	630.154	949
						576.549	926.4	632.506	956.7	630.125	949
						576.571	926.5	632.506	955.1	628.307	949.2
						575.523	926.9	630.716	953.6	628.285	949.2
						575.559	926.9	630.73	952.4	626.624	949.5
						574.69	927.3	628.27	951.2	625.233	949.5
						574.298	927.7	628.248	950.4	623.436	949.3
						574.191	927.3	626.144	949.2	623.571	949.3
						573.593	927.7	626.123	948.3	619.864	949.5
						573.044	930	624.105	947.6	619.849	949.1
						572.375	931.8	624.077	946.4	618.31	949.2
						572.396	932.9	621.403	946.2	618.231	949.6
						572.289	931.3	620.847	945.8	616.52	949.4
						571.855	932.6	619.435	945.3	616.477	949.4
						571.556	931.3	619.421	944.9	614.645	949.3
						571.705	931	619.421	944.5	614.688	949.7
						570.152	2625	617.275	943.9	611.373	949.5
						570.13	2640.6	617.296	943.9	611.408	949.6
						568.343	2707.3	617.282	943.4	609.555	949.7
						566.604	2799.7	614.865	943.6	608.016	949.9
						564.625	2779.6	614.872	943.2	607.866	949.8
						564.29	2777.1	614.844	943.2	605.913	949.7
						562.246	2903.9	612.726	943.2	604.38	949.8
						562.196	2932.2	612.655	942.7	604.316	949.7
						558.793	3220.6	610.388	942.9	603.589	950
						556.693	3202.1	610.345	942.7	601.508	949.7
						556.479	3194.8	610.323	942	601.458	949.6
						552.286	3645.2	607.672	942.3	599.569	949.7
						552.243	3647.3	607.651	942.4	597.952	949.7
						549.638	3642.5	607.651	942.4	596.505	949.6
						549.624	3643.9	604.935	942.5	595.016	949.6
						549.439	3644.8	604.928	942.5	593.384	950
						547.269	3644.4	604.921	942.6	591.524	949.8
						546.457	3643.9	601.87	942.7	589.522	949.9
						543.76	3756.5	601.863	942.2	587.862	949.9
						543.696	3716.4	601.863	942.2	586.379	950.1
						543.654	3735.2	601.664	942.3	584.933	950.5
						543.39	3766.6	599.618	942.1	583.557	951.3
						540.445	3801.8	599.618	942.5	581.832	952.6
						540.43	3804.6	599.625	942.5	580.257	952.6
						540.046	3800.5	596.546	942.6	578.96	952.5
						536.261	3797.2	596.497	942.5	576.594	952.7
						536.24	3798.5	593.404	943	575.617	952.5
						536.205	3798.5	593.397	942.4	574.876	952.5
						533.523	3797.2	593.383	942.6	573.729	952.1
						531.538	3796.4	590.041	943.1	572.482	952.1
						531.517	3796.2	590.005	942.8	571.065	952.6
						529.07	3798	588.744	943.6	568.072	2720.3
						526.183	3800	586.863	943.1	567.345	2798.6
						526.154	3799.3	586.856	943.2	565.286	2811.5
						522.705	3798.2	586.856	943.3	562.353	2798.6
						522.151	3797	586.849	943.5	560.793	2999.5
						522.065	3798	583.271	946.1	559.027	3187.5
						518.297	3798.2	582.508	945.5	557.418	3157.8
						518.297	3797.8	582.502	945.9	557.369	3216.7
						514.23	3795.7	582.48	946	555.659	3244.2
						512.171	3758.1	580.114	946.8	554.093	4832.1
						512.122	3761.4	580.078	946.2	554.065	5187.3
						512.121	3756.5	580.042	946	552.597	5470.7
						506.97	3750.7	578.097	946.4	551.309	5463.7
						506.863	3749.3	578.082	946.1	549.836	5442.8
						506.814	3750.8	578.032	946.3	548.256	5423.1
						506.792	3749.1	577.206	946.4	546.384	5485.5
						501.475	3747.8	575.923	946.3	544.818	5478.5
						501.062	3747.8	575.353	946.1	543.203	5622
						501.325	3748.3	575.338	946.2	541.495	5716.3
						501.304	3748.1	575.338	945.9	541.453	5716
						501.24	3747.9	575.331	946.5	539.93	5725.2
						498.865	3744.7	574.056	946.6	539.823	5713.3
						498.88	3744.5	573.735	946.1	538.066	5724.9
						498.872	3743.6	573.721	946.2	536.216	5720.6
						498.872	3743.1	573.671	946.1	533.185	5736.4
						498.872	3743.8	572.688	946.2	531.819	5851.9
						498.872	3742.3	572.061	946.3
						498.872	3742.1	572.075	946
						498.865	3741.9	572.111	945.8
						498.872	3741.6	571.384	946.8
						498.872	3741.4	569.98	2673.7
						498.872	3741.2	569.965	2679.4
						498.865	3739.7	569.944	2664.3
						498.872	3740.4	568.249	2761.6
						498.872	3742.4	568.227	2758.6
						498.872	3741.4	568.213	2764.3
						498.872	3742.4	568.206	2783.4
						498.872	3742.4	567.336	2760.8
						498.872	3742.6	566.702	2815.6
						498.872	3741.6	566.674	2807.3
						498.872	3741.2	566.667	2823
						498.865	3741.7	565.178	2799.8
						498.872	3741.2	564.886	2798.5
						498.872	3741.2	564.459	2796.9
						498.872	3739.5	563.213	2790.4
						498.865	3740.7	563.149	2788.7
						498.879	3740.7	560.87	2997.9
						498.872	3740.7	560.322	3094.3
						498.872	3740.7	560.315	3099.3
						498.872	3740.7	560.315	3107.3
						498.865	3741.7	558.649	3201.1
						498.872	3740.5	558.314	3175.3
						498.872	3740.7	558.257	3169.2
						498.872	3740.7	558.257	3169.2
						498.872	3741.5	558.243	3167.4
						498.872	3740.9	558.129	3166.8
						498.872	3740.7	557.275	3149
						498.872	3740.7	556.555	3163.2
						498.872	3740.9	556.548	3164.3
						498.865	3740.7	556.548	3163.6
						498.872	3740.7	555.246	3236.5
						498.872	3740.9	553.999	3548.8
						498.872	3739.9	553.935	3563
						498.872	3741.2	553.92	3555.9
						498.872	3741.2	553.913	3562.4
						498.872	3741.2	552.724	3574.5
						498.865	3742.2	552.041	3569.8
						498.872	3741.4	552.013	3566.2
						498.872	3742.2	552.02	3567.5
						498.865	3742.2	551.685	3570
						498.872	3740.7	550.304	3568.2
						498.872	3740.7	550.268	3565.3
						498.872	3741.2	550.269	3565.7
						498.872	3740.5	548.361	3566
						498.865	3740.5	548.361	3566.9
						498.872	3739.5	546.696	3568
						498.872	3739.9	546.041	3567.8
						498.872	3741.2	546.027	3567.1
						498.872	3740.7	543.664	3674.3
						498.865	3740.7	543.657	3627.4
						498.872	3740.7	541.601	3713
						498.865	3740.5	541.593	3713.7
						498.872	3740.9	541.594	3713.2
						498.865	3740.5	541.558	3713.9
								538.719	3711.6
								538.726	3711.3
								536.684	3713.7
								535.909	3713.3
								535.902	3713.7
								533.07	3717.6
								533.055	3716.4
								530.744	3717.9
								530.765	3717.1
								530.751	3716.9
								529.022	3717.1
								529.037	3811.6
								529.037	4702.4
								527.081	4584.6
								527.13	4324.7
								527.066	4009.6
								525.295	3725.9
								525.359	3735.5
								525.359	3732.8
								524.463	3744.6
								523.709	4214.4
								523.759	5054
								521.988	4934.6
								521.995	5540.7
								521.988	5000.4
								520.886	5500
